# Supplementary material
Source: PubMed Central journal article supplement (PMC2992300)
Supplement: supp_M110.183343_jbc.M110.183343-1.pdf [file supp_M110.183343_jbc.M110.183343-1.pdf]

***SUPPLEMENTAL MATERIAL***

*for the manuscript by*

Kazuo Yamasaki, Takashi Daiho, Stefania Danko, and Hiroshi Suzuki

**Ca<sup>2+</sup> Release to Lumen from ADP-sensitive Phosphoenzyme *E1PCa<sub>2</sub>*  
without Bound K<sup>+</sup> of Sarcoplasmic Reticulum Ca<sup>2+</sup>-ATPase**

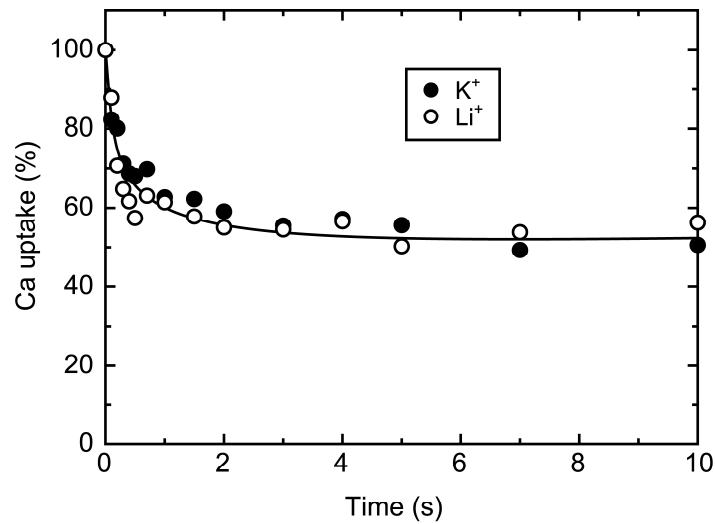

**Supplemental Figure S1.**  
**Labeling Site I by  $^{45}\text{Ca}^{2+}$ .**

SR vesicles ( $20 \mu\text{g}/\text{ml}$ ) were incubated with  $10 \mu\text{M}$   $^{45}\text{CaCl}_2$  for  $\sim 10$  min, then diluted by an equal volume of a solution containing  $2 \text{ mM}$  non-radioactive  $\text{CaCl}_2$ . After the subsequent incubation for the indicated time periods,  $\text{Ca}^{2+}$  uptake in a single turnover of *EP* was initiated by mixing with an equal volume of a solution containing  $20 \mu\text{M}$  ATP and  $2 \text{ mM}$  EGTA. Immediately, the sample was spotted on the membrane filter and washed for  $\sim 10$  s by the EGTA solution as in Fig. 4, and the amount of  $^{45}\text{Ca}^{2+}$  uptake was determined. All the solutions contained  $0.1 \text{ M}$  KCl (*closed circles*) or LiCl (*open circles*).

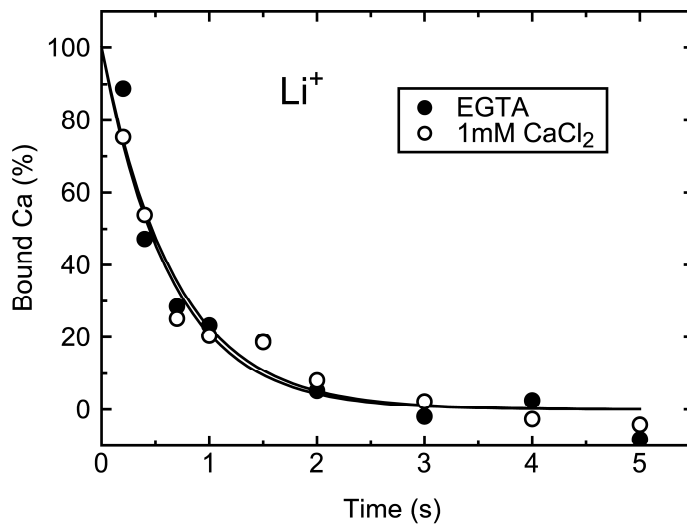

**Supplemental Figure S2.**

**Non-sequential  $^{45}\text{Ca}^{2+}$  release from  $\text{E1PCa}_2$  without  $\text{K}^+$ .** SR vesicles ( $20 \mu\text{g/ml}$ ) were phosphorylated for 30 s with  $10 \mu\text{M}$  ATP in  $10 \mu\text{M}$   $^{45}\text{CaCl}_2$ ,  $3 \mu\text{M}$  A23187, and  $0.1 \text{ M}$  LiCl. Then an aliquot of the solution was spotted on the membrane and washed by a washer containing  $0.1 \text{ M}$  LiCl,  $3 \mu\text{M}$  A23187, and non-radioactive  $1 \text{ mM}$   $\text{CaCl}_2$  (*open circles*) or  $2 \text{ mM}$  EGTA (*closed circles*) for the indicated time periods. The amounts of  $^{45}\text{Ca}^{2+}$  specifically bound to the  $\text{Ca}^{2+}$ -ATPase were determined. *Solid lines* show the least squares fit to a single-exponential.

Note, if the  $\text{Ca}^{2+}$  release is sequential, the biphasic  $^{45}\text{Ca}^{2+}$  release would take place when the first released  $^{45}\text{Ca}^{2+}$  is exchanged by non-radioactive  $1 \text{ mM}$   $\text{Ca}^{2+}$  (which is high enough for binding to the  $\text{Ca}^{2+}$  sites (Fig 6). We found the same single-exponential  $^{45}\text{Ca}^{2+}$  release kinetics upon the addition of excess EGTA and that of  $1 \text{ mM}$   $\text{Ca}^{2+}$ . The results show that the  $\text{Ca}^{2+}$  release from  $\text{E1PCa}_2$  in the absence of  $\text{K}^+$  is non-sequential, as previously observed in the presence of  $\text{K}^+$  for the normal release process  $\text{E1PCa}_2 \rightarrow \text{E2PCa}_2 \rightarrow \text{E2P} + 2\text{Ca}^{2+}$  (58, 59).
